# Supplementary material
Source: publisher site journal article supplement (https://www.dovepress.com/get_supplementary_file.php?f=504717.docx)
Supplement: Supplementary file 1 [file get_supplementary_file.php]

**Table S1** **Primers used for RT-qPCR**

| Primers(rat) | Sequences (5' → 3') |
| --- | --- |
| CDKN1B | GCACTGCCGAGATATGGAAGAAG |
| CDKN1B | CCACCTCCTGCCACTCGTATC |
| CITED2 | TTCATCGACGAGGAAGTGCTTATG |
| CITED2 | CTGCTGGGCTGCTGTTTGC |
| CLDN5 | CTGCCTTCCTGGACCACAATATC |
| CLDN5 | CGCCAGCACAGACTCATACAC |
| ANGPTL4 | TGGCTGCCTGCGGTAACG |
| ANGPTL4 | AGTTGCTGGATCTTGCTGTTCTG |
| ADM | AGCCAGCACTCAGAGCACAG |
| ADM | AGGTCCCAAAGCGGCATCC |
| SLC2A3 | TCTCCGTTGTCCTCCAGTTGTC |
| SLC2A3 | ACCACACCCGCTCCAATCG |
| PFKFB3 | TGCCTACTAGCCTACTTCCTTGAC |
| PFKFB3 | TGCGTGCTCACTGATTCTACATTC |
| MXI1 | AGGAGATGGAGCGGATACGAATG |
| MXI1 | CTGATGCTGGTGGTACTGATGTTG |
| GADD45B | TGCCTCCTGGTCACGAACTG |
| GADD45B | CACTGGTTATTGCCTCTGCTCTC |
| HILPDA | TGCCTCCTGGTCACGAACTG |
| HILPDA | CTCTGGATGGATGGTCTGGAAGG |
| GAPDH | GACATGCCGCCTGGAGAAAC |
| GAPDH | AGCCCAGGATGCCCTTTAGT |
